# Supplementary material for: Spermidine Enhances Heat Tolerance of Rice Seeds by Modulating Endogenous Starch and Polyamine Metabolism
Source: PubMed Central journal article supplement (PMC6480098; doi:10.3390/molecules24071395), 2019-04-09
Supplement: molecules-24-01395-s001.pdf [file molecules-24-01395-s001.pdf]

Table S1. Effects of exogenous Spd and CHA on the rice seed size at different developmental stages under high-temperature stress.

| Treatment  | Days after pollination | Length/mm     | Width/mm       |
|------------|------------------------|---------------|----------------|
| NT         | 11                     | 8.34 ± 0.100a | 2.40 ± 0.044a  |
| HT         |                        | 8.33 ± 0.108a | 2.53 ± 0.095a  |
| HT+SPD     |                        | 8.31 ± 0.309a | 2.49 ± 0.041a  |
| HT+CHA     |                        | 8.39 ± 0.110a | 2.48 ± 0.027a  |
| HT+CHA+Spd |                        | 8.39 ± 0.110a | 2.48 ± 0.027a  |
| NT         | 16                     | 8.34 ± 0.134a | 2.42 ± 0.043a  |
| HT         |                        | 8.37 ± 0.056a | 2.46 ± 0.038a  |
| HT+SPD     |                        | 8.39 ± 0.081a | 2.52 ± 0.057a  |
| HT+CHA     |                        | 8.39 ± 0.058a | 2.48 ± 0.050a  |
| HT+CHA+Spd |                        | 8.39 ± 0.056a | 2.43 ± 0.038a  |
| NT         | 28                     | 8.34 ± 0.100a | 2.20 ± 0.051a  |
| HT         |                        | 8.37 ± 0.087a | 2.18 ± 0.058b  |
| HT+SPD     |                        | 8.39 ± 0.080a | 2.29 ± 0.046a  |
| HT+CHA     |                        | 8.39 ± 0.042b | 2.08 ± 0.053b  |
| HT+CHA+Spd |                        | 8.39 ± 0.141a | 2.08 ± 0.043a  |
| NT         | 35                     | 8.34 ± 0.131a | 2.22 ± 0.052a  |
| HT         |                        | 8.37 ± 0.072a | 2.10 ± 0.034ab |
| HT+SPD     |                        | 8.39 ± 0.131a | 2.24 ± 0.055a  |
| HT+CHA     |                        | 8.39 ± 0.120b | 2.02 ± 0.046ab |
| HT+CHA+Spd |                        | 8.39 ± 0.137a | 2.07 ± 0.061b  |

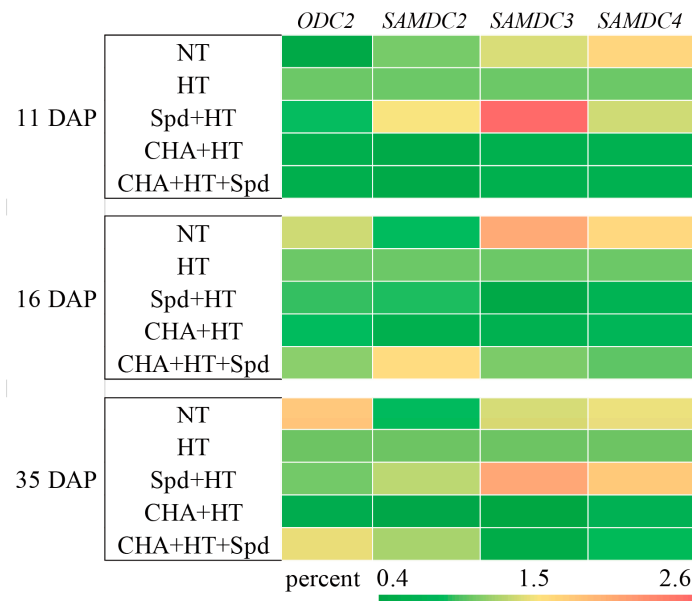

Figure S1. Effects of exogenous Spd and CHA on polyamine synthesis-related genes (putative *ODC2*, *SAMDC2*, *SAMDC3*, *SAMDC4*) expressions of rice seeds during development under high-temperature (40°C, 5 days). The expression level of HT was regarded as 1.0.

NT: Normal temperature control; HT: High temperature control; Spd+HT: 1.5mM exogenous Spd treatment + high temperature; CHA+HT: 20mM exogenous CHA treatment + high temperature; CHA+HT+Spd: 20mM Exogenous CHA treatment + high temperature + exogenous 1.5mM Spd.
